# Supplementary material for: Synthesis, crystal structures, luminescent and thermal properties of two new metal–organic coordination polymers based on zinc(ii) carboxylates
Source: Royal Society of Chemistry journal article supplement (doi:10.1039/c0nj00196a), 2010-01-01
Supplement: c0nj00196a.pdf [file c0nj00196a.pdf]

## Electronic Supplementary Information

### Synthesis, crystal structures, luminescent and thermal properties of two new metal-organic coordination polymers based on zinc(II) carboxylates

Sergey A. Sapchenko<sup>a,b</sup>, Danil N. Dybtsev<sup>a,c</sup>, Denis G. Samsonenko<sup>a,b</sup> and Vladimir P. Fedin<sup>\*a,b</sup>

<sup>a</sup> *Nikolaev Institute of Inorganic Chemistry, Siberian Branch of the Russian Academy of Sciences, 3 Akad. Lavrentiev Av., 630090 Novosibirsk, Russian Federation. Fax: +7 (383) 330 9489 ; Tel : +7 (383) 330 9490 ; E-mail: [cluster@niic.nsc.ru](mailto:cluster@niic.nsc.ru)*

<sup>b</sup> *Novosibirsk State University, 2 Pirogova street, 630090 Novosibirsk, Russian Federation*

<sup>c</sup> *Division of the Advanced Materials Science, POSTECH, San 31, Hyojadong, Pohang 790-784, Republic of Korea*

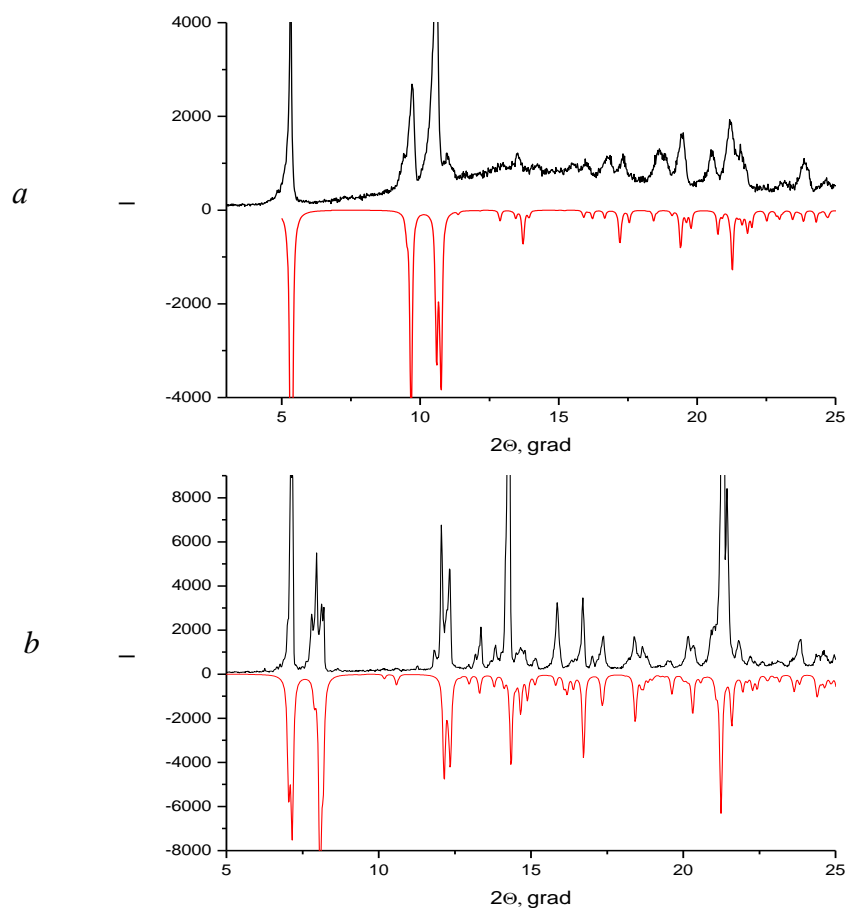

Fig. S1. A comparison of experimental XRPD plots for **1** (a), **2** (b) with those derived from single-crystal X-ray diffraction data (inverse).
